# Supplementary material
Source: PubMed Central journal article supplement (PMC7686903)

**Supplementary Table 1:** Clinical and laboratory features and subsequent events of CMML patients' comparison by center (combined Mayo clinic and Moffitt cohort)

| <b>Variables [Median or n; range or %]</b>                  | <b>Mayo Cohort<br/>(n=582)</b> | <b>Moffitt Cohort<br/>(n=277)</b> | <b>P-value</b> |
|-------------------------------------------------------------|--------------------------------|-----------------------------------|----------------|
| <b>Age in years; median (range)</b>                         | 72 (2-95)                      | 71 (17-95)                        | 0.83           |
| <b>Sex (Male); n (%)</b>                                    | 388 (66.7%)                    | 195 (69.4%)                       | 0.69           |
| <b>Hemoglobin g/dL; median (range)</b>                      | 10.7 (1.4-16.9)                | 11 (3.4-15.6)                     | 0.75           |
| <b>WBC x 10<sup>9</sup>/L; median (range)</b>               | 12.8 (1.3-264.8)               | 13.9 (2.4-288.6)                  | 0.75           |
| <b>ANC x10<sup>9</sup>/L; median (range)</b>                | 6.1 (0.0-151.0)                | 6.5 (0.1-155.6)                   | 0.58           |
| <b>AMC x 10<sup>9</sup>/L; median (range)</b>               | 2.7 (0.0-84)                   | 2.7 (0.4-35.6)                    | 0.74           |
| <b>Platelets x 10<sup>9</sup>/L; median(range)</b>          | 98 (7.0-1277.0)                | 104 (2.0-1945.0)                  | 0.49           |
| <b>Presence of IMC; n (%)</b>                               | 340 (58.4%)                    | 154 (55.5%)                       | 1.00           |
| <b>PB blasts %; median (range)</b>                          | 0 (0.0-19.0)                   | 0 (0.0-15.0)                      | 0.98           |
| <b>BM blasts %; median (range)</b>                          | 3 (0.0-19.0)                   | 3 (0.0-19.0)                      | 0.57           |
| <b>FAB CMML subtype<br/>N Evaluable</b>                     | 582                            | 275                               | 0.63           |
| dCMML; n (%)                                                | 300 (51.5%)                    | 129 (46.9%)                       |                |
| pCMML; n (%)                                                | 282 (48.5%)                    | 146 (53.1%)                       |                |
| <b>WHO 2016 CMML subtype<br/>N Evaluable</b>                | 560                            | 257                               | 0.66           |
| CMML-0; n (%)                                               | 327 (58.4%)                    | 163 (63.4%)                       |                |
| CMML-1; n (%)                                               | 135 (24.1%)                    | 56 (21.8%)                        |                |
| CMML-2; n (%)                                               | 98 (17.5%)                     | 38 (14.8%)                        |                |
| <b>CPSS Cytogenetic risk stratification<br/>N Evaluable</b> | 520                            | 271                               | 0.59           |
| Low; n (%)                                                  | 379 (72.9%)                    | 205 (75.6%)                       |                |
| Intermediate; n (%)                                         | 58 (11.2%)                     | 36 (13.3%)                        |                |
| High; n (%)                                                 | 83 (15.9%)                     | 30 (11.1%)                        |                |
| <b>Next generation sequencing analysis<br/>N Evaluable</b>  | 330                            | 277                               | 0.02           |
| <b>1. Epigenetic regulators</b>                             |                                |                                   |                |
| <i>TET2</i>                                                 | 141 (42.7%)                    | 171 (61.7%)                       |                |
| <i>IDH1</i>                                                 | 5 (1.5%)                       | 2 (0.7%)                          |                |
| <i>IDH2</i>                                                 | 20 (6.1%)                      | 11 (3.9%)                         |                |
| <i>DNMT3A</i>                                               | 21 (6.4%)                      | 20 (7.2%)                         |                |
| <b>2. Chromatin regulators</b>                              |                                |                                   |                |
| <i>ASXL1</i>                                                | 166 (50.3%)                    | 115 (41.5%)                       |                |
| <i>EZH2</i>                                                 | 11 (3.3%)                      | 35 (12.6%)                        |                |
| <b>3. Transcription factors</b>                             |                                |                                   |                |
| <i>RUNX1</i>                                                | 34 (10.3%)                     | 52 (18.8%)                        |                |
| <b>4. Spliceosome factors</b>                               |                                |                                   |                |
| <i>SRSF2</i>                                                | 153 (46.4%)                    | 105 (37.9%)                       |                |
| <i>U2AF1</i>                                                | 23 (6.9%)                      | 19 (6.8%)                         |                |
| <i>ZRSR2</i>                                                | 16 (4.8%)                      | 21 (7.6%)                         |                |

|                                             |             |             |      |
|---------------------------------------------|-------------|-------------|------|
| <b>5. Cell signaling</b>                    |             |             |      |
| <i>NRAS</i>                                 | 49 (14.8%)  | 46 (16.5%)  | 0.74 |
| <i>KRAS</i>                                 | 19 (5.8%)   | N/A         | N/A  |
| <i>CBL</i>                                  | 49 (14.8%)  | 42 (15.0%)  | 0.94 |
| <i>PTPN11</i>                               | 9 (2.7%)    | N/A         | N/A  |
| <i>JAK2</i>                                 | 25 (7.6%)   | 22 (7.9%)   | 0.89 |
| <i>CSF3R</i>                                | 4 (1.2%)    | N/A         | N/A  |
| <i>KIT</i>                                  | 11 (3.3%)   | 14 (5.0%)   | 0.54 |
| <i>MPL</i>                                  | 2 (0.6%)    | 3 (1.1%)    | 0.76 |
| <i>CALR</i>                                 | 1 (0.3%)    | N/A         | N/A  |
| <b>6. Tumor suppressor gene</b>             |             |             |      |
| <i>TP53</i>                                 | 9 (2.7%)    | 8 (2.9%)    | 1.0  |
| <b>7. Others</b>                            |             |             |      |
| <i>SETBP1</i>                               | 38 (11.5%)  | 24 (8.6%)   | 0.63 |
| <b>Mayo Molecular Model<br/>N Evaluable</b> | 572         | 277         | 0.07 |
| Low risk; n (%)                             | 61 (10.7%)  | 38 (13.6%)  | 0.07 |
| Intermediate-1 risk; n (%)                  | 179 (31.3%) | 106 (38.4%) |      |
| Intermediate-2 risk; n (%)                  | 168 (29.4%) | 81 (29.4%)  |      |
| High risk; n (%)                            | 164 (28.7%) | 52 (18.6%)  |      |
| <b>GFM Prognostic Model<br/>N Evaluable</b> | 572         | 277         |      |
| Low risk; n (%)                             | 271 (47.4%) | 114 (41.2%) | 0.24 |
| Intermediate risk; n (%)                    | 223 (39.0%) | 108(39.1%)  |      |
| High risk; n (%)                            | 78 (13.6%)  | 55 (19.7%)  |      |
| <b>IPSS-R Group<br/>N Evaluable</b>         | 512         | 276         |      |
| Very low; n (%)                             | 108 (21.1%) | 70 (25.4%)  | 0.54 |
| Low; n (%)                                  | 192 (37.5%) | 105 (38.2%) |      |
| Intermediate; n (%)                         | 121 (23.6%) | 58 (21.1%)  |      |
| High; n (%)                                 | 59 (11.5%)  | 34 (12.1%)  |      |
| Very High; n (%)                            | 32 (6.3%)   | 9 (3.2%)    |      |
| <b>Deaths; n (%)</b>                        | 353 (60.6%) | 126 (45.5%) | -    |
| <b>Leukemic transformation; n (%)</b>       | 105 (18.0%) | 60 (21.6%)  | -    |

The bold values represent p values that are statistically significant;  $p < 0.05$  (Only provided if data is available for all three cohorts).

**Key:** CMML: chronic myelomonocytic leukemia, AMC: absolute monocyte count; ANC: absolute neutrophil count; IMC: immature circulating cells; WBC: white blood cell count; PB: peripheral blood; BM: bone marrow; WHO: World Health Organization; CPSS-Mol: clinical/molecular CMML-specific prognostic scoring system; dCMML: dysplastic chronic myelomonocytic leukemia; pCMML: proliferative chronic myelomonocytic leukemia; FAB: French-American-British; GFM: Groupe Francophone des Myelodyplasies; IMC: immature myeloid cells; <sup>MT</sup>: mutated; <sup>WT</sup>: wild type; N/A: not available.; IPSS-R: Revised International Prognostic Scoring System; VAF: Variant Allele Frequency

**Supplementary 2:** Detailed characteristics, mutational patterns and associated outcomes of patients with *SF3B1* mutated chronic myelomonocytic leukemia with concurrent splicing mutations

| Age (Year) | Sex | WHO/FAB CMML subtype     | <i>SF3B1</i> mutation (nucleotide and amino acid change) | <i>SF3B1</i> VAF (%) | Karyotype                                                             | Concomitant mutations (VAF%)                                                                                                               | Bone Marrow RS (%) | Acute Leukemia Transformation (duration from diagnosis to transformation) | Status at last contact (duration from diagnosis to last contact) |
|------------|-----|--------------------------|----------------------------------------------------------|----------------------|-----------------------------------------------------------------------|--------------------------------------------------------------------------------------------------------------------------------------------|--------------------|---------------------------------------------------------------------------|------------------------------------------------------------------|
| 83         | M   | CMML-0/<br>Dysplastic    | c.2098A>G<br>p.Lys700Glu                                 | 23.0                 | 46,XY [20]                                                            | <b>SRSF2; c.284C&gt;A;</b><br><b>p.Pro95His (22%)</b><br>CBL; c.1384C>T;<br>p.Arg462* (45%)                                                | 18                 | No                                                                        | Dead<br>(57.3 months)                                            |
| 69         | M   | CMML-1/<br>Dysplastic    | c.1986C>A<br>p.His662Gln                                 | 45.0                 | 46,XY, add(11)(p11.2),<br>der(18)t(1;18)(q32;q21.3)<br>[12]/46,XY [8] | <b>ZRSR2; c.396del;</b><br><b>p.Glu133Arg (8%)</b><br>KIT; c.2447A>T;<br>p.Asp816Val (9%)<br>CBL; c.1142G>A;<br>p.Cys381Tyr (12%)          | 70                 | No                                                                        | Alive<br>(100.7 months)                                          |
| 43         | F   | CMML-0/<br>Proliferative | c.2098A>G<br>p.Lys700Glu                                 | 32.0                 | 46,XX [20]                                                            | <b>SRSF2; c.284C&gt;T;</b><br><b>p.Pro95Leu (16%)</b><br>IDH1; c.394C>A;<br>p.Arg132Ser (46%)                                              | 42                 | No                                                                        | Dead<br>(6.6 months)                                             |
| 66         | M   | CMML-0/<br>Dysplastic    | c.1868A>G<br>p.Tyr623Cys                                 | 42.0                 | 46,XY [20]                                                            | <b>SRSF2; c.284C&gt;T;</b><br><b>p.Pro95His (45%)</b><br>TET2; c.812C>G;<br>p.Ser271* (33%)                                                | 80                 | No                                                                        | Dead<br>(60.9 months)                                            |
| 78         | M   | CMML-0/<br>Dysplastic    | c.2098A>G<br>Lys700Glu<br>c.2293T>A<br>Tyr765Asn         | 48%<br>15%           | 46, XY                                                                | TET2; c.4082G>A;<br>p.G1361D (46%) and<br>c.4909del;<br>p.L1637Yfs*58 (43%)<br>ASXL1; c.1900-<br>1922del; p.E635Rfs*15<br>(37%)            | 50                 | No                                                                        | Dead<br>(42.3 months)                                            |
| 69         | F   | CMML-1/<br>Proliferative | c.2098G>A<br>p.Lys700Glu                                 | 45.2                 | 46,XX [19]                                                            | <b>SRSF2; c.284C&gt;T;</b><br><b>p.Pro95His (2.8%)</b><br>TET2; c.4392G>A;<br>p.Cys1464* (97.3%)<br>CBL; c.1142G>A;<br>p.Cys381Tyr (36.6%) | Occasional         | No                                                                        | Alive<br>(16.8 months)                                           |
| 72         | M   | CMML-1/<br>Dysplastic    | c.2005C>G,<br>p.Gln669Glu                                | 43.1                 | 46,XY [20]                                                            | IDH2; c.419G>A;<br>p.Arg140Gln (44.2%)<br><b>SRSF2; c.284C&gt;T;</b><br><b>p.Pro95Leu (42.0%)</b>                                          | >15                | Yes<br>(70 months)                                                        | Dead<br>(70.3 months)                                            |
| 75         | M   | CMML-1/<br>Dysplastic    | c.2098A>G<br>p.Lys700glu<br>c.1660A>G;<br>p.Lys554E      | N/A                  | 46,XY,del(20)(q11.2q13.1)<br>[18]/ 46,XY [2]                          | IDH1; c.394C>T;<br>p.Arg132Cys<br>DNMT3A; c.2111G>C;<br>p.Trp704Ser<br>RUNX1;<br>c.971_972insAGTA;<br>p.Ser389Vfs)                         | >15                | No                                                                        | Alive<br>(35.8 months)                                           |
| 77         | M   | CMML-2/<br>Dysplastic    | c.2098A>G<br>p.Lys700glu<br>c.1660A>G;<br>p.Lys554E      | N/A                  | 46,XY [20]                                                            | TET2; c.1285G>A;<br>p.Gly429Arg                                                                                                            | >15                | Yes<br>(5.1 months)                                                       | Alive<br>(20.3 months)                                           |

**Abbreviations** – F: Female, M: Male, WHO/FAB: World Health Organization/French American British Classification, CMML: Chronic Myelomonocytic Leukemia, A: Adenine, G: Guanine, C: Cytosine, T: Thymine, Arg: Arginine, Lys: Lysine, Glu: Glutamic acid, Gly: Glycine, His: Histidine, Gln: Glutamine, Tyr: Tyrosine, Asn: Asparagine, Cys: Cysteine, Asp: Aspartic Acid, Ser: Serine, Trp: Tryptophan, VAF: Variant Allele Frequency, inv: inversion, der: derivative chromosome, RS: Ring Sideroblast

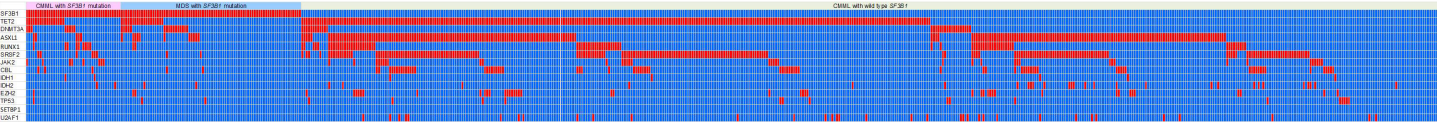

Supplement: advancesADV2020003345-suppl1.pdf [file advancesADV2020003345-suppl1.pdf]
